# Supplementary material
Source: PubMed Central journal article supplement (PMC3603286)
Supplement: NIHMS449876-supplement-1_si_001.pdf [file NIHMS449876-supplement-1_si_001.pdf]

# Supporting Information

## Macrocyclization of the ATCUN motif controls metal binding and catalysis

Kosh P. Neupane, Amanda R. Aldous and Joshua A. Kritzer\*

Department of Chemistry, Tufts University, 62 Talbot Avenue, Medford, MA 02155, United States

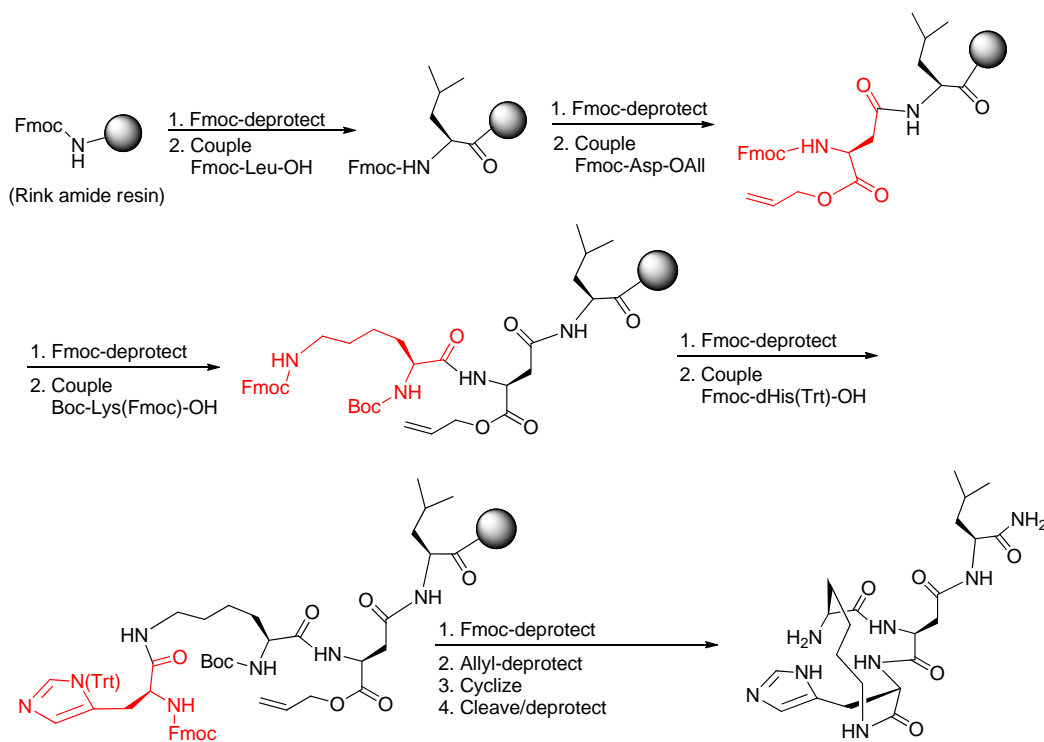

**Scheme 1.** Synthesis scheme for cyclic peptide **1**. Cyclic peptides **2** and **3** were synthesized in an analogous manner. Further synthesis details for peptides **1-6** are described in the Methods section of the main text.

**Table S1.** Characterization of Peptides by HPLC and Mass Spec

| Peptide Sequence                                                   | Retention Time (HPLC) |                | ESI Mass/MALDI |        | Overall % Yield (after HPLC) |
|--------------------------------------------------------------------|-----------------------|----------------|----------------|--------|------------------------------|
|                                                                    | Analytical C18        | Preparative C8 | Calc.          | Found  |                              |
| <i>cyclo</i> <sup>1-3</sup> [Lys-Asp(Leu)-DHis], <b>1</b>          | 9.5                   | 7.6            | 492.59         | 493.36 | 20                           |
| <i>cyclo</i> <sup>1-3</sup> [DLys-Asp(Leu)-His], <b>2</b>          | 9.8                   | 7.5            | 492.59         | 493.45 | 17                           |
| <i>cyclo</i> <sup>1-3</sup> [Lys-Asp(Leu)-His], <b>3</b>           | 9.2                   | 6.7            | 492.59         | 493.27 | 19                           |
| NH <sub>2</sub> -Gly-Gly-His-Leu-CONH <sub>2</sub> , <b>4</b>      | 9.0                   | 6.5            | 381.43         | 381.01 | 60                           |
| NH <sub>2</sub> -Gly-Gly-DHis-Leu-CONH <sub>2</sub> , <b>5</b>     | 8.7                   | 6.5            | 381.43         | 382.67 | 63                           |
| NH <sub>2</sub> -Lys(Ac)-Asn-DHis-Leu-CONH <sub>2</sub> , <b>6</b> | 11.0                  | 8.6            | 551.60         | 551.60 | 90                           |

Anal. gradient: (5-65% B, 30 min)

Prep. gradient: (5-40% B; 25 min)

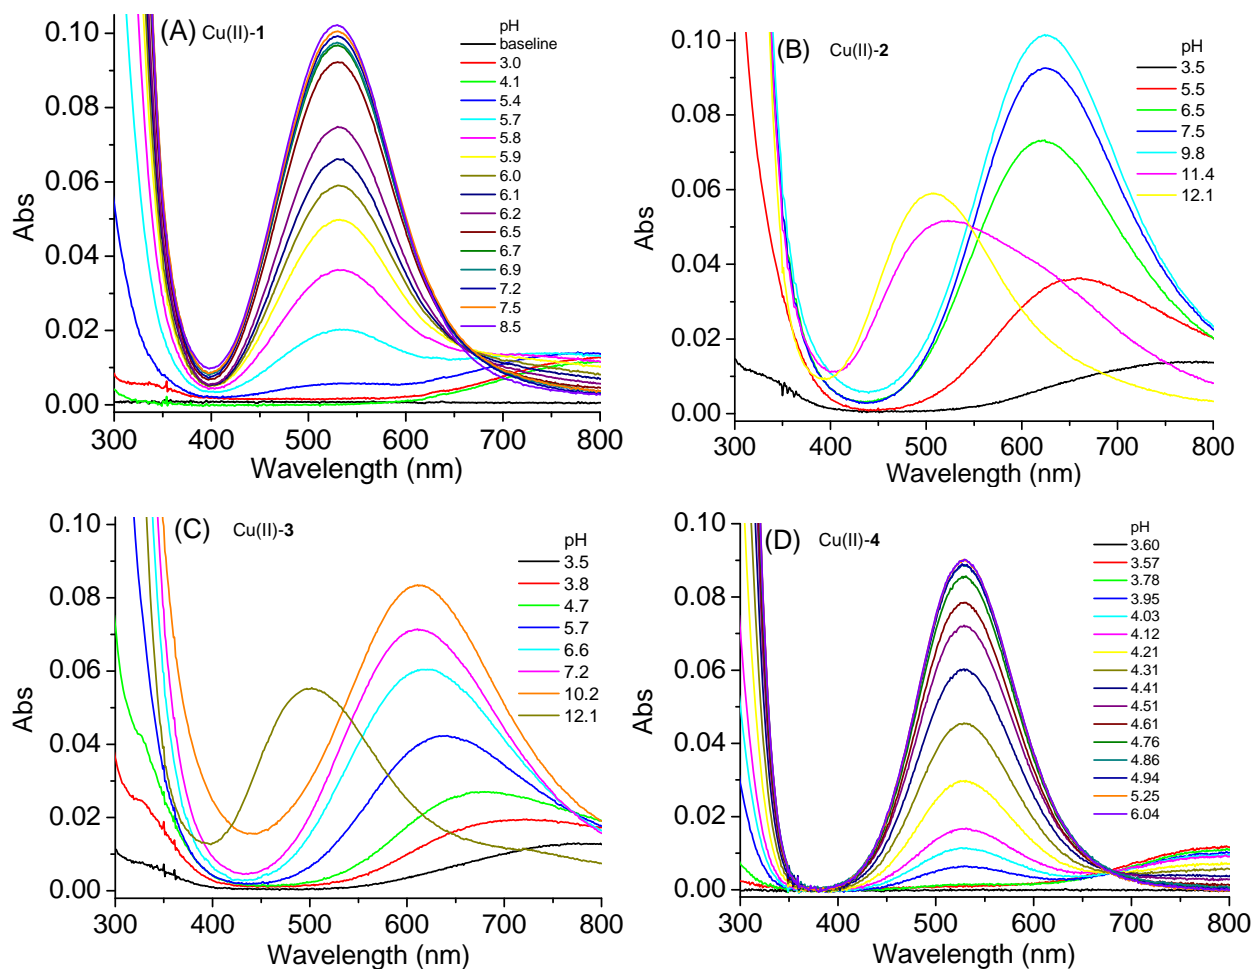

**Figure S1.** pH dependence of Cu(II) binding to cyclic peptide **1** (A), cyclic peptide **2** (B), cyclic peptide **3** (C) and linear peptide **4** (D). All pH titration experiments were carried out in ultrapure (Barnstead Easypure UF) water and pH was raised with dilute KOH.

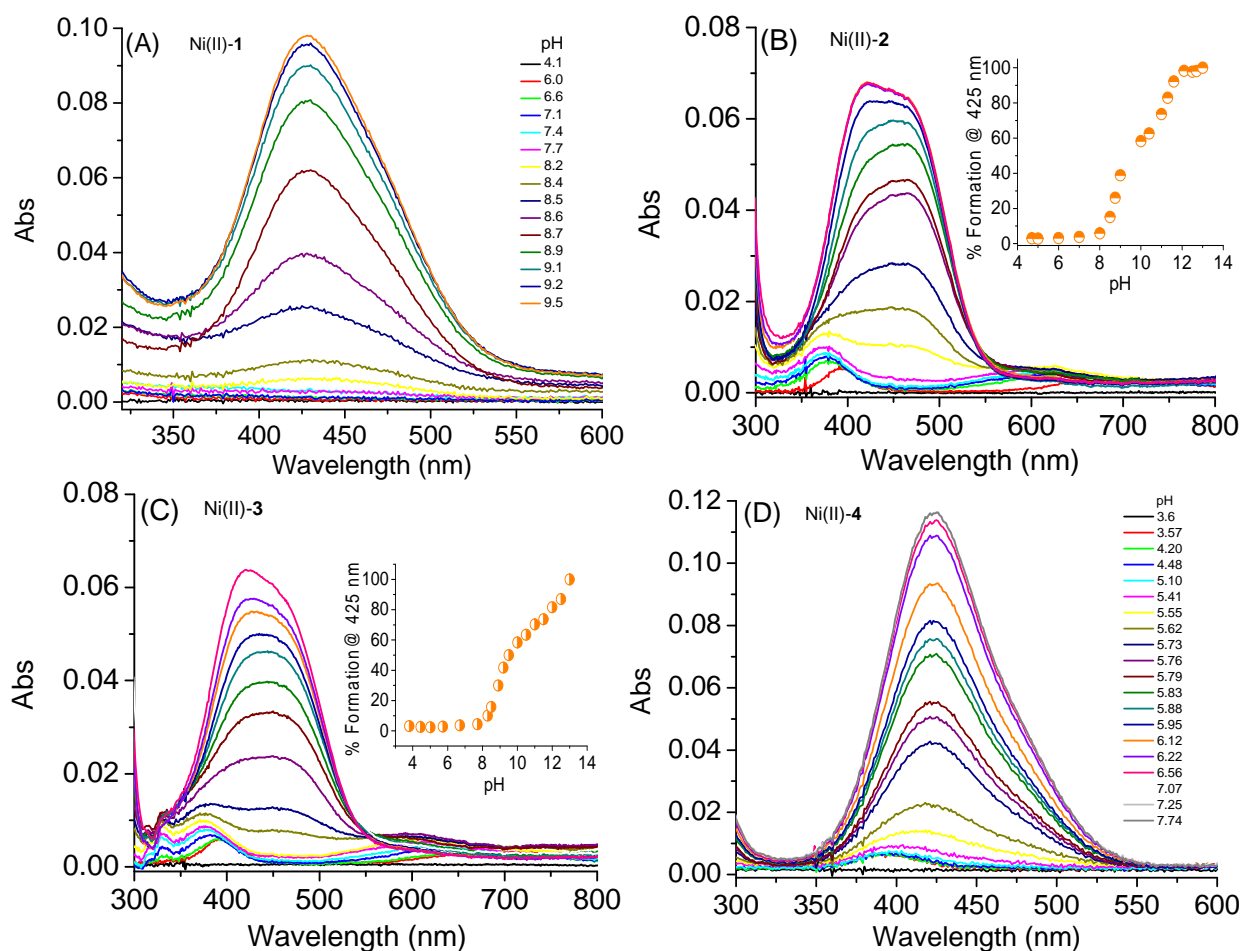

**Figure S2.** pH dependence of Ni(II) binding to cyclic peptide **1** (A), cyclic peptide **2** (B), cyclic peptide **3** (C) and linear control peptide **4** (D). All pH titration experiments were carried out in ultrapure water and pH was raised with dilute KOH.

**Figure S3.** UV-vis spectra of 1 mM Ni(II)-**1** complex (blue), 1 mM Cu(II)-**1** complex (green), and mixtures of 0.5 mM Ni(II) and 0.5 mM Cu(II) with either 1 mM **1** or 1 mM **4** (red and black, respectively). Complexes were prepared at pH 7.5 in N-ethylmorpholine buffer using CuCl<sub>2</sub> and NiCl<sub>2</sub>.

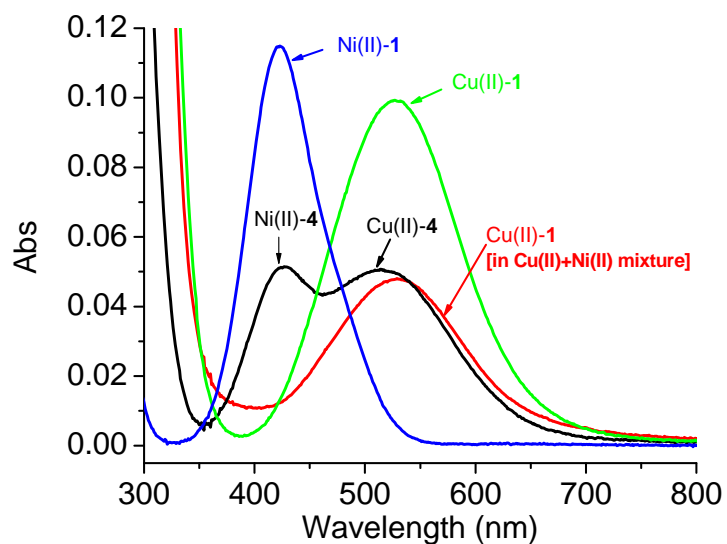

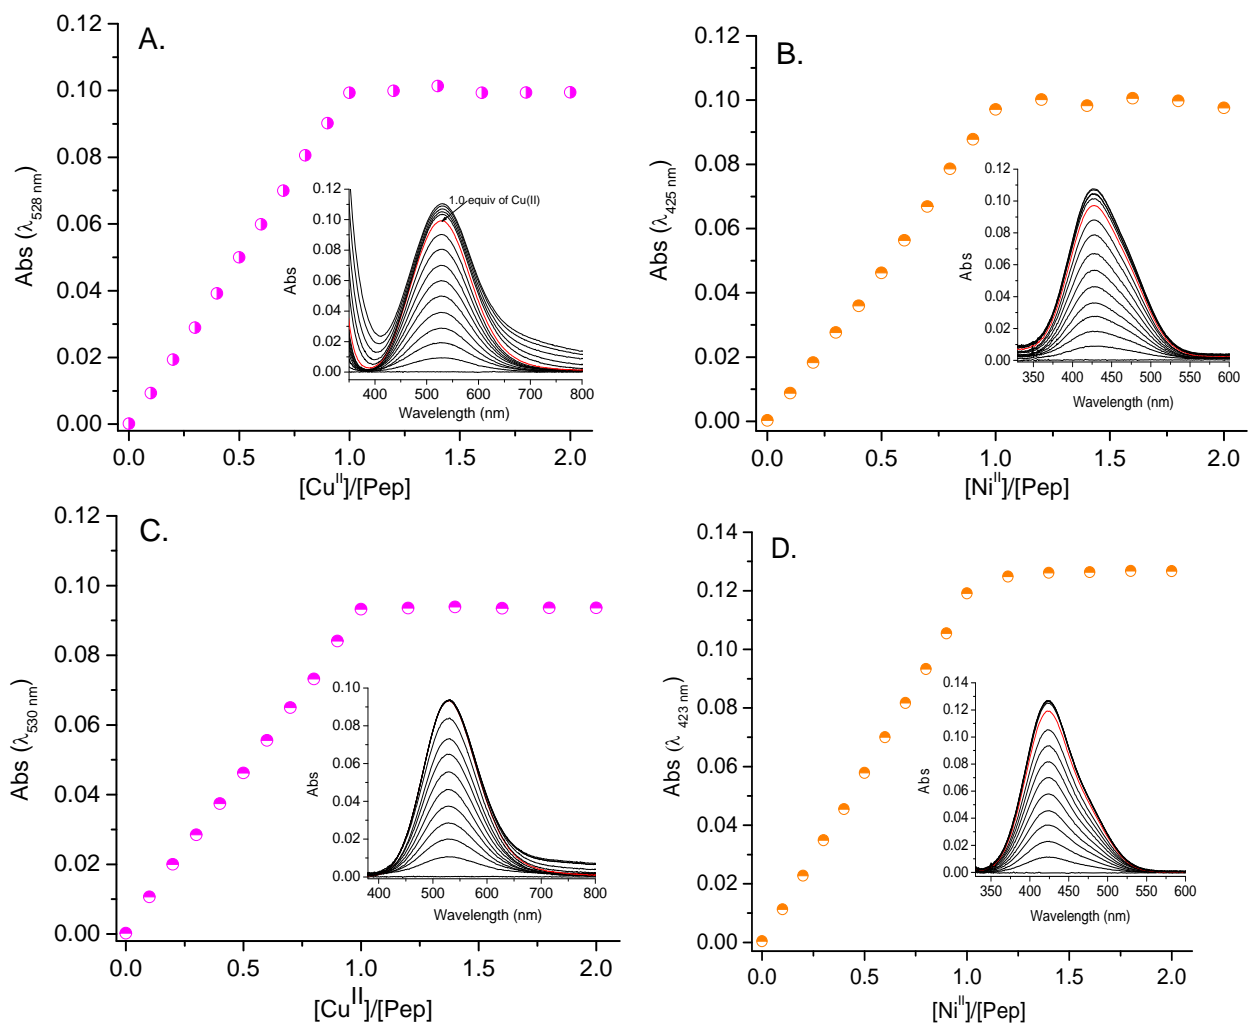

**Figure S4.** Titration plots showing the UV-vis absorption (*d-d* transition) change during titration with Cu(II) and Ni(II) for cyclic peptide **1** and linear peptide **4**. (A) Cu(II) versus **1** (pH 7.5); (B) Ni(II) versus **1** (pH 9.5); (C) Cu(II) versus **4** (pH 7.5); (D) Ni(II) versus **4** (pH 7.5). Insets show the UV-vis spectra from each titration experiment, with the spectrum at 1:1 ratio shown in color. All titration studies were performed in 50 mM NEM buffer at room temperature.

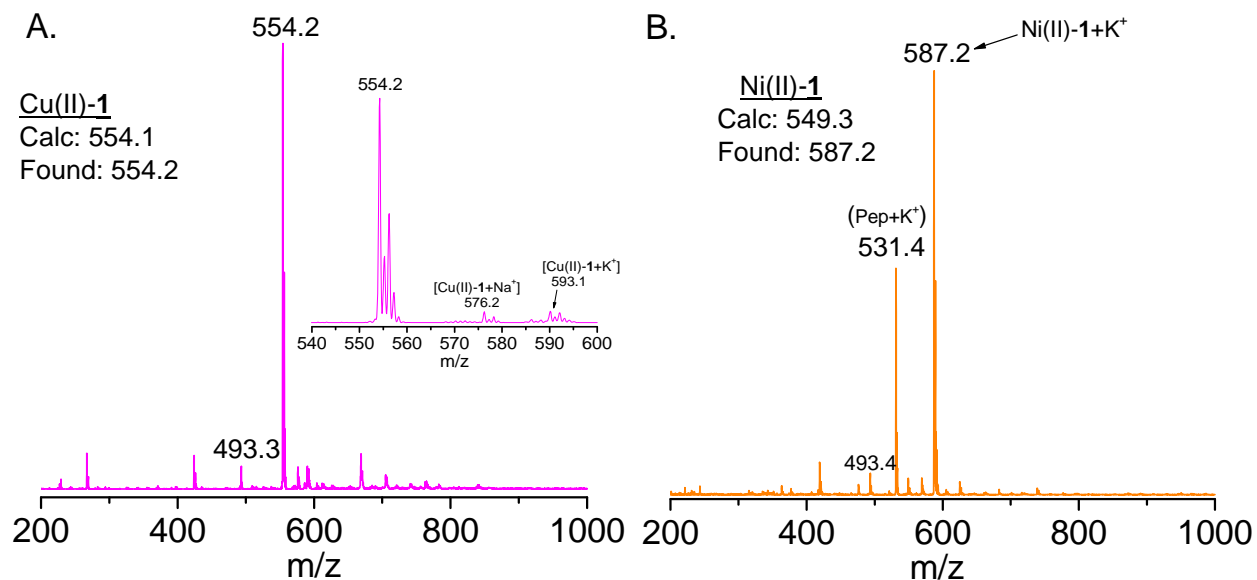

**Figure S5.** ESI-MS spectra of Cu(II)-1 (pH 7.5) (A) and Ni(II)-1 (pH 9.5) (B). The ESI-MS samples (0.1 mM) were prepared in 50 mM NEM buffer with a 1:1 metal:peptide ratio.

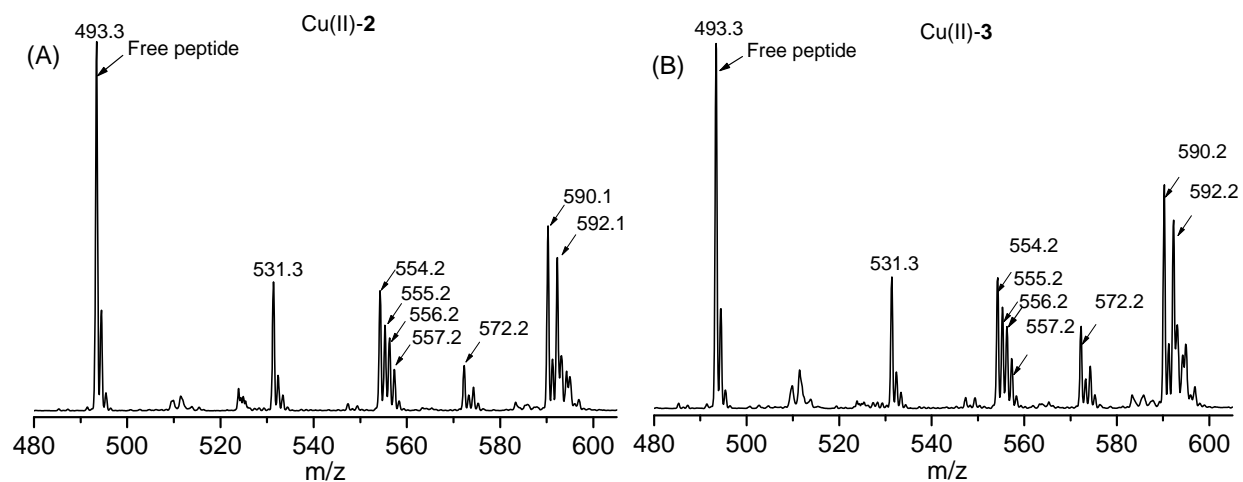

**Figure S6.** ESI-MS spectra of Cu(II)-2 (A) and Cu(II)-3 (B) in NEM buffer (pH 7.5). Masses with an additional 18 and 36 Da are observed, which may be due to the coordination of one or two water molecules to the Cu-peptide complex.

**Table S2.** ESI-MS data of metallopeptides. All Cu(II)-peptide complexes were prepared in 50 mM NEM buffer (pH 7.5). Ni(II)-peptide complexes were prepared in 50 mM NEM buffer (pH 7.5), except for Ni(II)-1 for which the pH was 9.5.

| Peptides | Metallopeptides          |                     |                           |                          |
|----------|--------------------------|---------------------|---------------------------|--------------------------|
|          | Cu(II)-Peptide ( $M^+$ ) |                     | Ni(II)-peptides ( $M^+$ ) |                          |
|          | calc.                    | found               | calc.                     | found                    |
| <b>1</b> | 554.1                    | 554.2               | 549.3                     | 587.2 (+K <sup>+</sup> ) |
| <b>2</b> | 554.1                    | 554.2, 572.2, 590.1 | –                         | –                        |
| <b>3</b> | 554.1                    | 554.2, 572.2, 590.2 | –                         | –                        |
| <b>4</b> | 442.9                    | 443.1               | 438.1                     | 438.1                    |
| <b>5</b> | 442.9                    | 443.2               | 438.1                     | 438.0                    |
| <b>6</b> | 613.1                    | 613.3               | 608.3                     | 608.3                    |

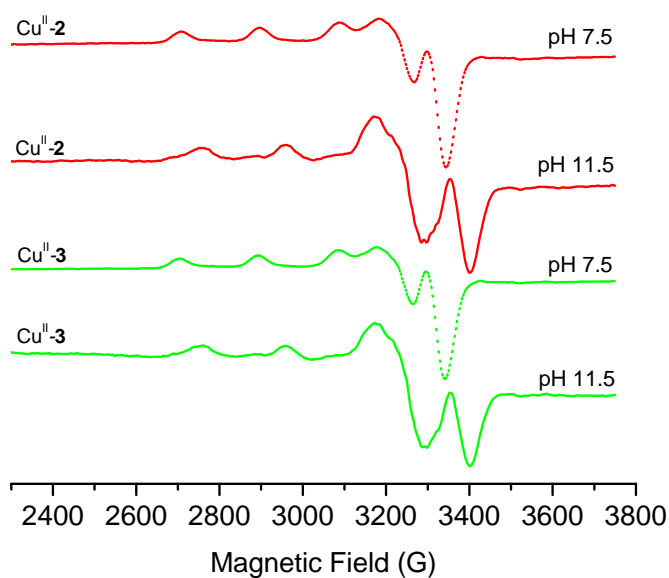

**Figure S7.** X-band (9.31 GHz) EPR spectra of Cu<sup>II</sup>-2 (red) and Cu<sup>II</sup>-3 (green) at pH 7.5 and 11.5. All spectra were recorded at 123 K in 100 mM Tris-HCl buffer in presence of 10 % glycerol.

**Table S3.** EPR properties of Cu(II)-peptide complexes in 100 mM Tris-HCl buffer, pH 7.5 (except where noted), in the presence of 10% glycerol.

| Cu <sup>II</sup> -Peptides | $g_{\perp}$     | $A_{\parallel}$ (G) |
|----------------------------|-----------------|---------------------|
| <b>1</b>                   | 2.046           | 200                 |
| <b>2</b>                   | 2.057<br>2.050* | 187<br>202*         |
| <b>3</b>                   | 2.057<br>2.047* | 188<br>202*         |
| <b>4</b>                   | 2.047           | 198                 |
| <b>5</b>                   | 2.048           | 198                 |
| <b>6</b>                   | 2.046           | 200                 |

\* EPR recorded in Tris-HCl buffer, pH=11.5.

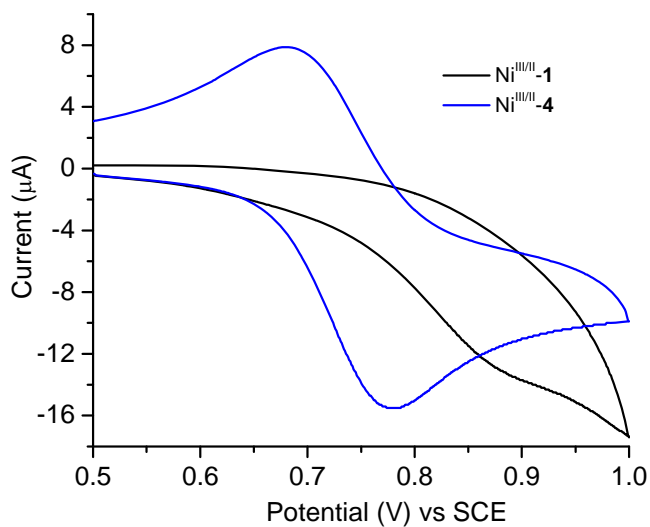

**Figure S8.** Cyclic voltammograms of Ni(II)-1 (pH 9.5) and Ni(II)-4 (pH 7.5) in ultrapure water.

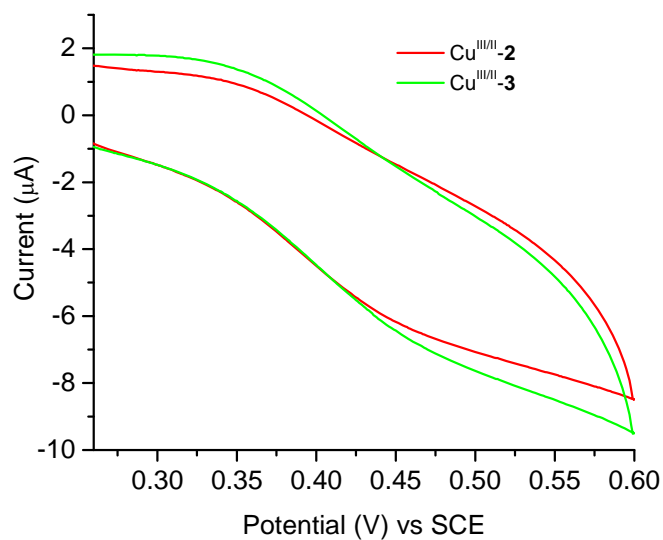

**Figure S9.** Cyclic voltammograms of Cu(II)-2 and Cu(II)-3 in ultrapure water at pH 11.5.

**Table S4.** Electrochemical data of metallopeptides.

| <b>M-Peptide</b> | <b><math>E_p^{ox}</math> (V)</b> | <b><math>E_p^{red}</math> (V)</b> | <b><math>\Delta E_p</math> (V)</b> | <b><math>E_{1/2}</math> (V)</b> |
|------------------|----------------------------------|-----------------------------------|------------------------------------|---------------------------------|
| Cu(II)-1         | 0.778                            | 0.700                             | 0.078                              | 0.739                           |
| Cu(II)-2         | 0.450                            | 0.360                             | 0.090                              | 0.405                           |
| Cu(II)-3         | 0.450                            | 0.350                             | 0.100                              | 0.400                           |
| Cu(II)-4         | 0.836                            | 0.768                             | 0.068                              | 0.802                           |
| Cu(II)-5         | 0.844                            | 0.774                             | 0.070                              | 0.809                           |
| Cu(II)-6         | 0.778                            | 0.702                             | 0.076                              | 0.740                           |
| Ni(II)-1         | 0.880                            | Irrev                             | –                                  | –                               |
| Ni(II)-4         | 0.780                            | 0.680                             | 0.100                              | 0.730                           |



## Au(III) binding

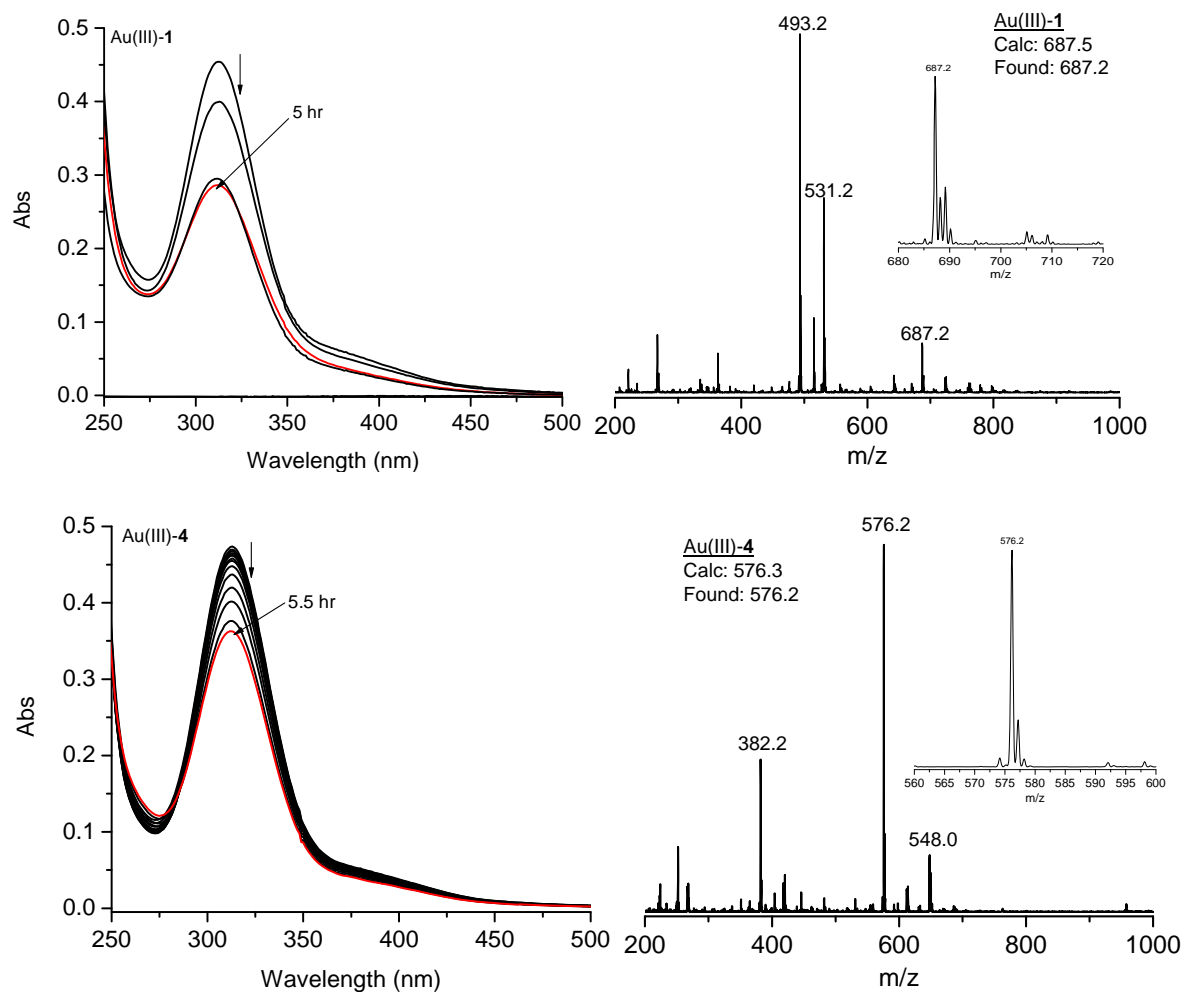

**Figure S10.** Detection of (a) Au(III) binding to 0.1 mM cyclic peptide **1** and linear peptide **4** by UV-vis (left) and ESI-MS (right). These experiments were performed using 0.1 mM metal cation in ultrapure water with pH adjusted using dilute HCl when necessary.

(a) Pt(II) binding

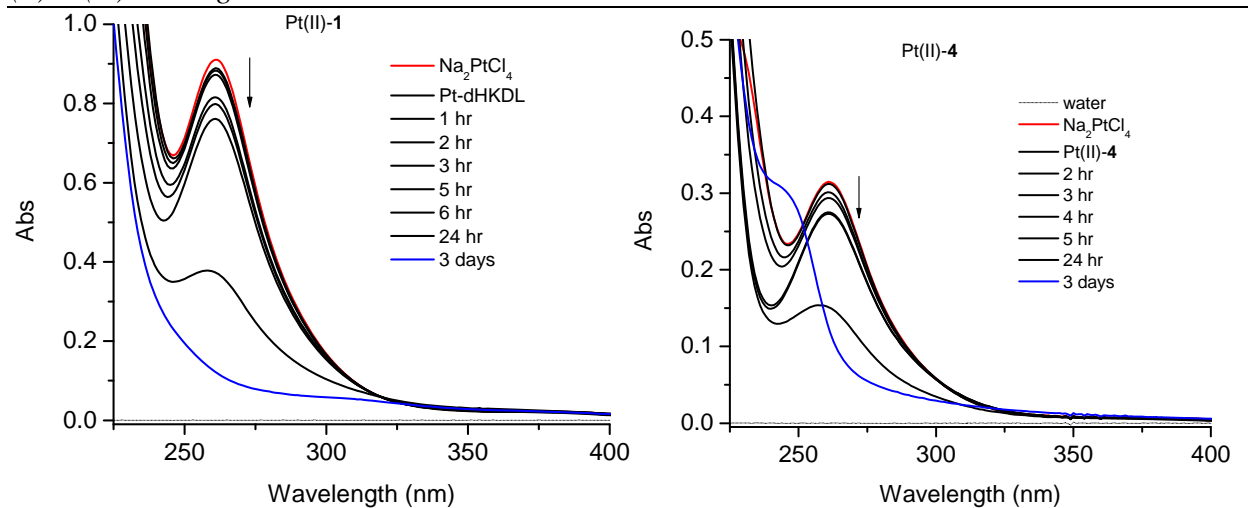

(b) Pd(II) binding

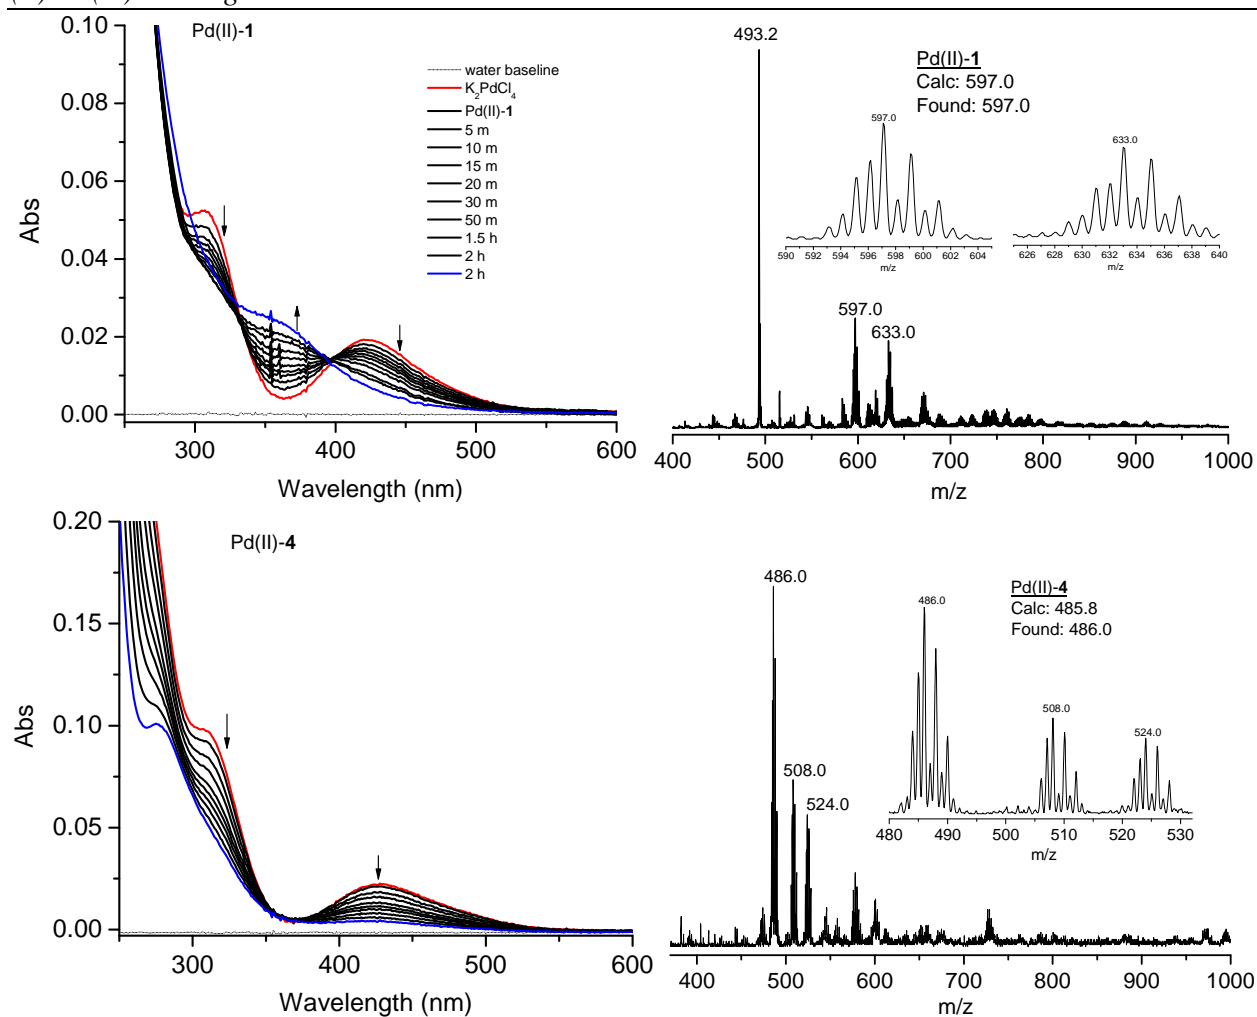

**Figure S11.** Detection of (a) Pt(II) and (b) Pd(II) binding to 0.1 mM cyclic peptide **1** and linear peptide **4** by UV-vis (left) and ESI-MS (right). These experiments were performed using 0.1 mM metal cation in ultrapure water with pH adjusted using dilute HCl when necessary.
